# Supplementary material for: Prevalence of Pathogenic Germline BRCA1/2 Variants and Their Association with Clinical Characteristics in Patients with Epithelial Ovarian Cancer in a Rural Area of Japan
Source: MDPI journal article supplement (doi:10.3390/genes13061085), 2022-06-18
Supplement: s1 [file s1]

## Supplementary Materials

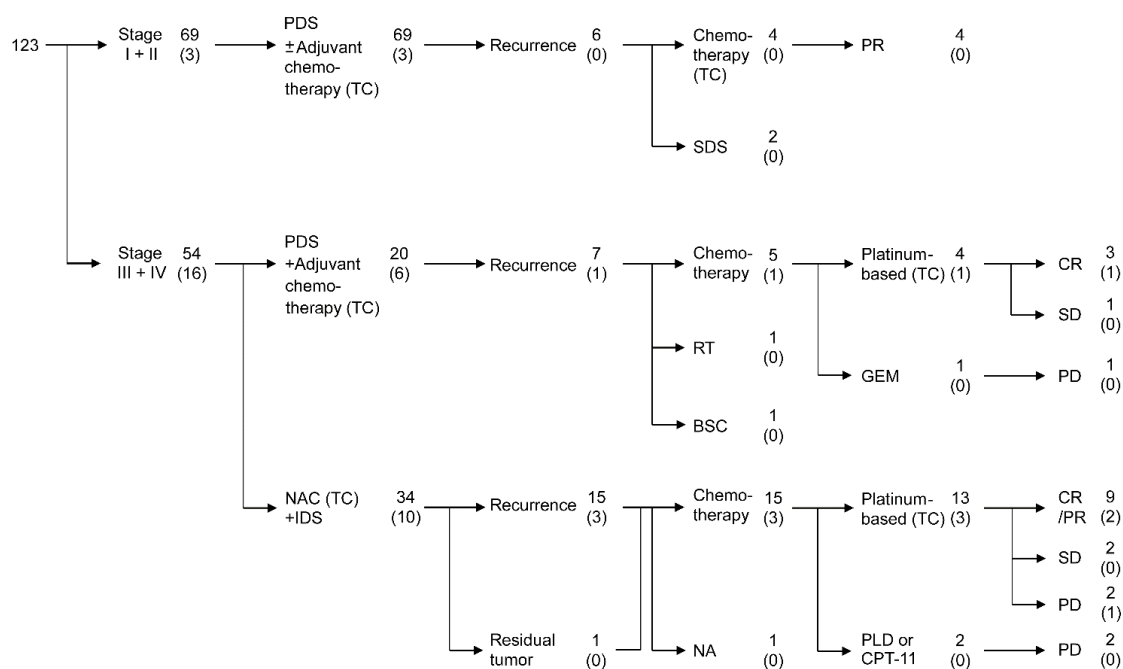

Figure S1: Therapies and responses to the treatments for 123 OC patients

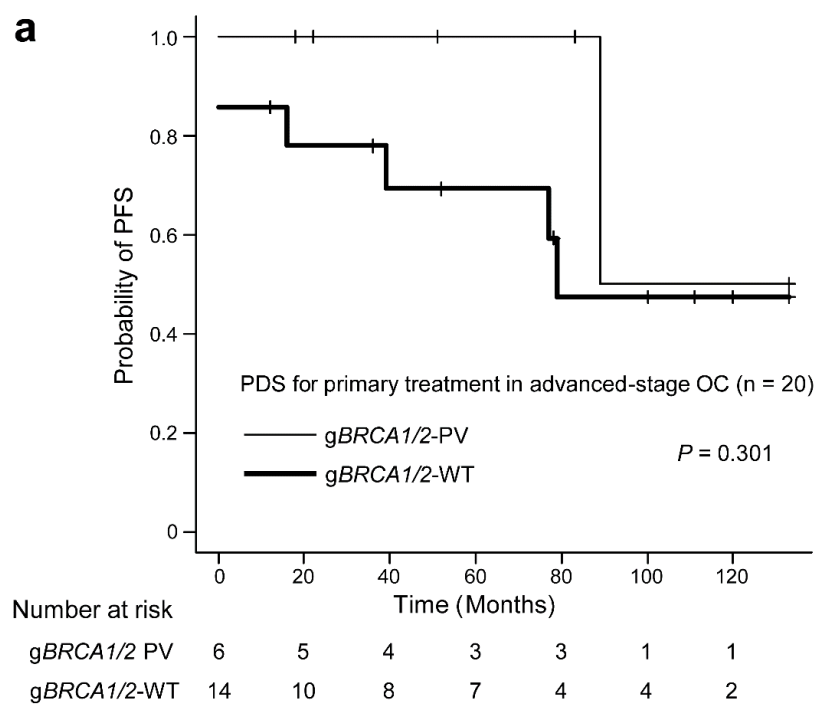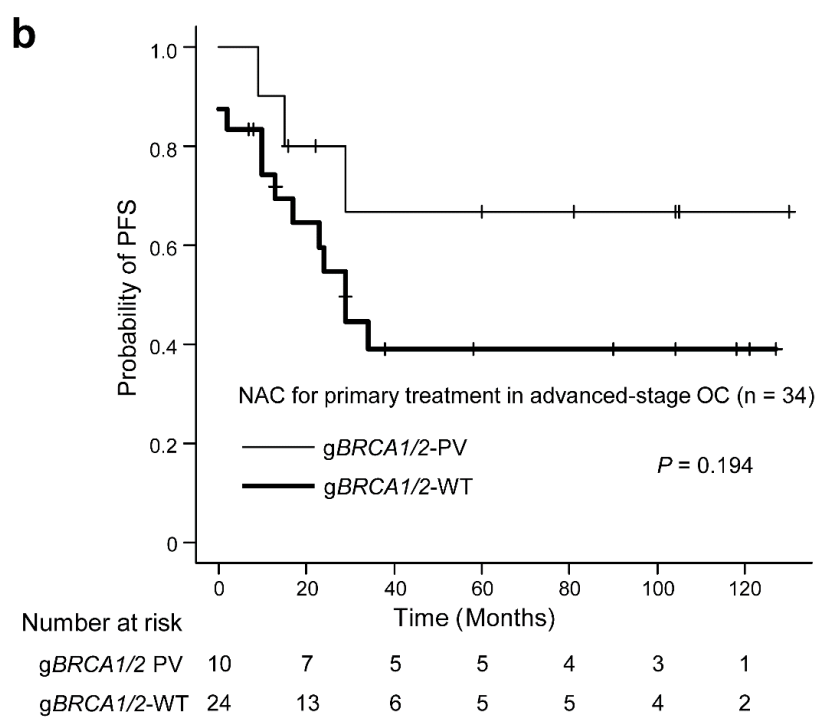

Figure S2: Progression-free survival (PFS) rates in advanced-stage OC patients according to primary treatments. (a) PDS, (b) NAC-IDS

**Supplementary Table S1** Demographic characteristics and pathogenic BRCA variants of ovarian cancer patients in a combination of three studies in Japan

| Characteristics                                                                                   | Present study | Hirasawa et al.<br>[Ref. 6] | Charlotte study<br>[Ref. 7] | Total           |
|---------------------------------------------------------------------------------------------------|---------------|-----------------------------|-----------------------------|-----------------|
| <b>Total (n)</b>                                                                                  | 123           | 230                         | 634                         | 987             |
| <b>Age, median, range (years)</b>                                                                 | 55 (28–85)    | 54 (27–87)                  | 56.9 (mean) (24–89)         | NA              |
| <40                                                                                               | 0/15 (0.0%)   | 4/18 (22.2%)                | 4/41 (9.8%)                 | 8/74 (11.0%)    |
| ≥40, <55                                                                                          | 5/47 (10.6%)  | 15/99 (15.2)                | 89/593 (15.0%)              | 20/156 (13.2%)  |
| ≥55                                                                                               | 14/61 (30.0%) | 8/113 (7.1%)                |                             | 22/174 (12.9%)  |
| <b>Menopausal status</b>                                                                          |               |                             |                             |                 |
| Pre-menopausal                                                                                    | 4/46 (8.7%)   | NA                          | 70/169 (41.4%)              | 74/215 (34.3%)  |
| Post-menopausal                                                                                   | 13/71 (18.3%) | NA                          | 22/462 (4.8%)               | 35/533 (6.6%)   |
| Unknown                                                                                           | 2/6 (33.3%)   | NA                          | 1/3 (33.3%)                 | 3/9 (33.3%)     |
| <b>Histological type</b>                                                                          |               |                             |                             |                 |
| HGSC                                                                                              | 13/47 (27.7%) | 22/74 (29.7%)               | 78/274 (28.5%)              | 113/395 (28.6%) |
| LGSC                                                                                              | 0/5 (0.0%)    | 0/3 (0.0%)                  | 1/5 (20.0%)                 | 1/13 (7.7%)     |
| Endometrioid carcinoma                                                                            | 3/18 (16.7%)  | 1/58 (1.7%)                 | 8/120 (6.7%)                | 12/196 (6.1%)   |
| Clear cell carcinoma                                                                              | 1/28 (3.6%)   | 2/71 (2.8%)                 | 4/187 (2.1%)                | 7/286 (2.4%)    |
| Mucinous carcinoma                                                                                | 0/13 (0.0%)   | 0/18 (0.0%)                 | 0/19 (0.0%)                 | 0/50 (0%)       |
| Others                                                                                            | 2/12 (16.7%)  | 1/6 (16.7%)                 | 2/29 (6.9%)                 | 5/47 (10.6%)    |
| <b>Stage</b>                                                                                      |               |                             |                             |                 |
| I                                                                                                 | 2/53 (3.8%)   | 2/107 (1.9%)                | 8/236 (3.4%)                | 12/396 (3%)     |
| II                                                                                                | 1/16 (6.3%)   | 4/25 (16.0%)                | 7/71 (9.9%)                 | 12/112 (10.7%)  |
| III                                                                                               | 15/50 (30.0%) | 14/80 (17.5%)               | 62/244 (25.4%)              | 91/374 (24.3%)  |
| IV                                                                                                | 1/4 (25.0%)   | 7/18 (38.9%)                | 16/80 (20.0%)               | 24/102 (23.5%)  |
| Other                                                                                             | —             | —                           | 0/3 (0.0%)                  |                 |
| <b>Personal history of breast cancer</b>                                                          |               |                             |                             |                 |
| Presence                                                                                          | 3/11 (27.3%)  | 2/6 (33.3%)                 | 14/30 (46.7%)               | 42 (30.2%)      |
| <b>Familial history (including first- and second-degree relatives) of HBOC-associated cancers</b> |               |                             |                             |                 |
| Breast cancer                                                                                     | 8/23 (34.8%)  | 5/22 (22.7%)                | 37/118 (31.4%)              | 50/163 (30.7%)  |
| Pancreatic cancer                                                                                 | 1/10 (10.0%)  | NA                          | 12/53 (22.6%)               | 13/112 (11.6%)  |
| Ovarian cancer                                                                                    | 2/5 (40.0%)   | 5/22 (22.7%)                | 23/36 (63.9%)               | 30/134 (22.4%)  |
| Prostate cancer                                                                                   | 4/16 (40.0%)  | NA                          | 6/32 (18.8%)                | 30/134 (22.4%)  |
| <b>Germline pathogenic variants</b>                                                               |               |                             |                             |                 |
| BRCA1                                                                                             | 6 (4.9%)      | 19 (8.3%)                   | 63 (9.9%)                   | 88 (8.9%)       |
| BRCA2                                                                                             | 13 (10.5%)    | 8 (3.5%)                    | 30 (4.7%)                   | 51 (5.2%)       |
| BRCA1 or BRCA2                                                                                    | 19 (15.4%)    | 27 (11.7%)                  | 93 (14.7%)                  | 139 (14.1%)     |

Values are n (%), unless otherwise stated.

NA, not available; HGSC, high-grade serous carcinoma; LGSC, low-grade serous carcinoma; FIGO, International Federation of Gynecology and Obstetrics; HBOC, hereditary breast and ovarian cancer syndrome.

**Supplementary Table S2** The clinical course and clinical response to chemotherapy

|                                                                            | n                              | gBRCA1/2 variant status |            | P-value*        |
|----------------------------------------------------------------------------|--------------------------------|-------------------------|------------|-----------------|
|                                                                            |                                | PV                      | WT         |                 |
| <b>Primary treatment strategy in all cases</b>                             | 123                            | 19                      | 104        | PDS vs. NAC     |
| Primary debulking surgery (PDS)                                            | 89                             | 9 (47.4%)               | 80 (76.9%) | <b>0.0123</b>   |
| Neoadjuvant chemotherapy (NAC)                                             | 34                             | 10 (52.6%)              | 24 (23.1%) |                 |
| <b>Primary treatment in advanced-stage cases (stage III and IV)</b>        | 54                             | 16                      | 38         | PDS vs. NAC     |
| PDS                                                                        | 20                             | 6 (37.5%)               | 14 (36.8%) | 1.000           |
| NAC                                                                        | 34                             | 10 (62.5%)              | 24 (63.2%) |                 |
| <b>Clinical response to TC therapy in primary treatment</b>                | 38 (34 NAC + 4 suboptimal PDS) | 12                      | 26         | PR/CR vs. SD/PD |
| PR+CR                                                                      | 35                             | 12 (100%)               | 23 (88.5%) | 0.5377          |
| SD                                                                         | 2                              | 0 (0%)                  | 2 (7.7%)   |                 |
| PD                                                                         | 1                              | 0 (0%)                  | 1 (3.8%)   |                 |
| <b>Recurrence in advanced-stage cases</b>                                  | 54                             | 19                      | 35         | No vs. YES      |
| No                                                                         | 31                             | 15 (78.9%)              | 16 (45.7%) | <b>0.0232</b>   |
| Yes                                                                        | 23                             | 4 (21.1%)               | 19 (54.3%) |                 |
| Platinum-sensitive recurrence                                              | 17 (73.9%)                     | 4 (100%)                | 13 (68.4%) | 0.5392          |
| Platinum-resistant recurrence                                              | 6 (26.1%)                      | 0 (0%)                  | 6 (31.6%)  |                 |
| <b>Clinical response to chemotherapy in recurrent advanced-stage cases</b> | 20                             | 4                       | 16         | PR/CR vs. SD/PD |
| PR+CR                                                                      | 12                             | 3 (75%)                 | 9 (56.2%)  | 0.6186          |
| SD                                                                         | 3                              | 0 (0%)                  | 3 (18.8%)  |                 |
| PD                                                                         | 5                              | 1 (25%)                 | 4 (25.0%)  |                 |

PV, pathogenic variants; WT, wild-type; TC, paclitaxel-carboplatin; PR, partial response; CR, complete response; SD, stable disease; PD, progressive disease.

\***Bold font** indicates a statistically significant value ( $P < 0.05$ ) obtained by analysis with Pearson's  $\chi^2$ -test or Fisher's exact test.
